# Supplementary material for: Modelling Virgin Olive Oil Potential Shelf-Life from Antioxidants and Lipid Oxidation Progress
Source: MDPI journal article supplement (doi:10.3390/antiox11030539), 2022-03-11
Supplement: s1 [file s1]

**Supplementary Materials:**

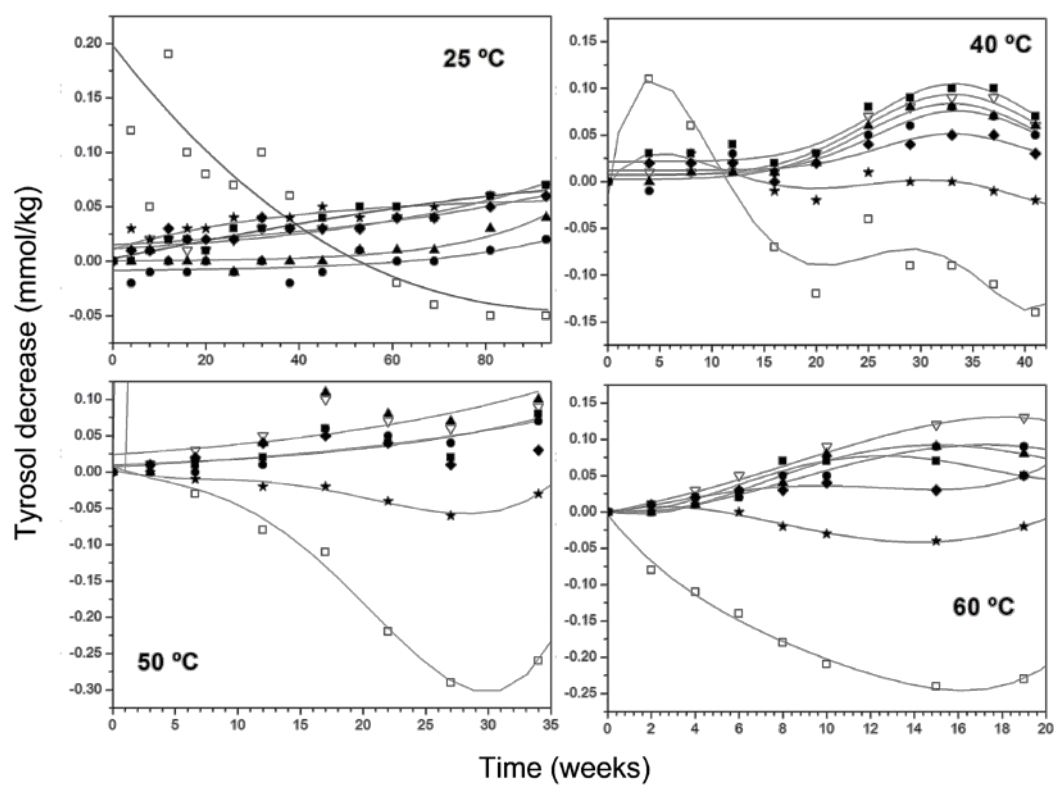

**Figure S1.** Decrease of tyrosol content in VOO samples at 25, 40, 50 and 60 °C. Samples: ■, I; ●, II; ▲, III; ▽, IV; ◆, V; □, VI; ★, VII.

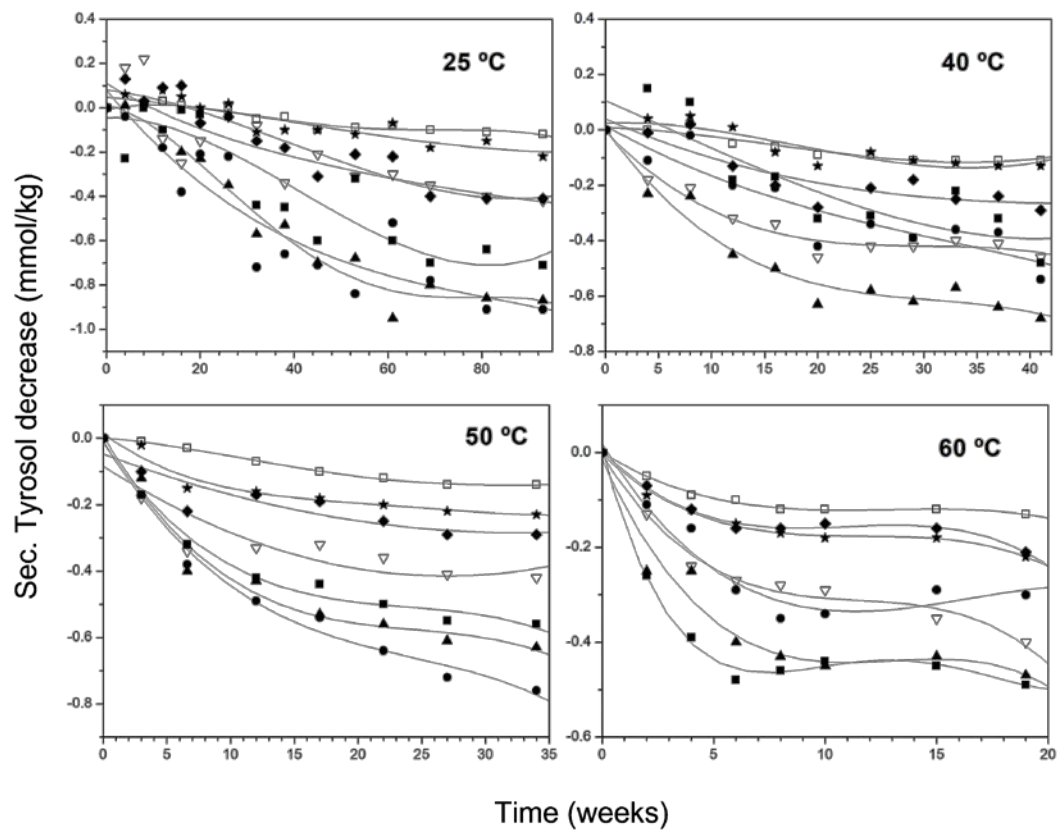

**Figure S2.** Decrease of tyrosol secoiridoid derivatives content in VOO samples at 25, 40, 50 and 60 °C. Samples: ■, I; ●, II; ▲, III; ▽, IV; ◆, V; □, VI; ★, VII.

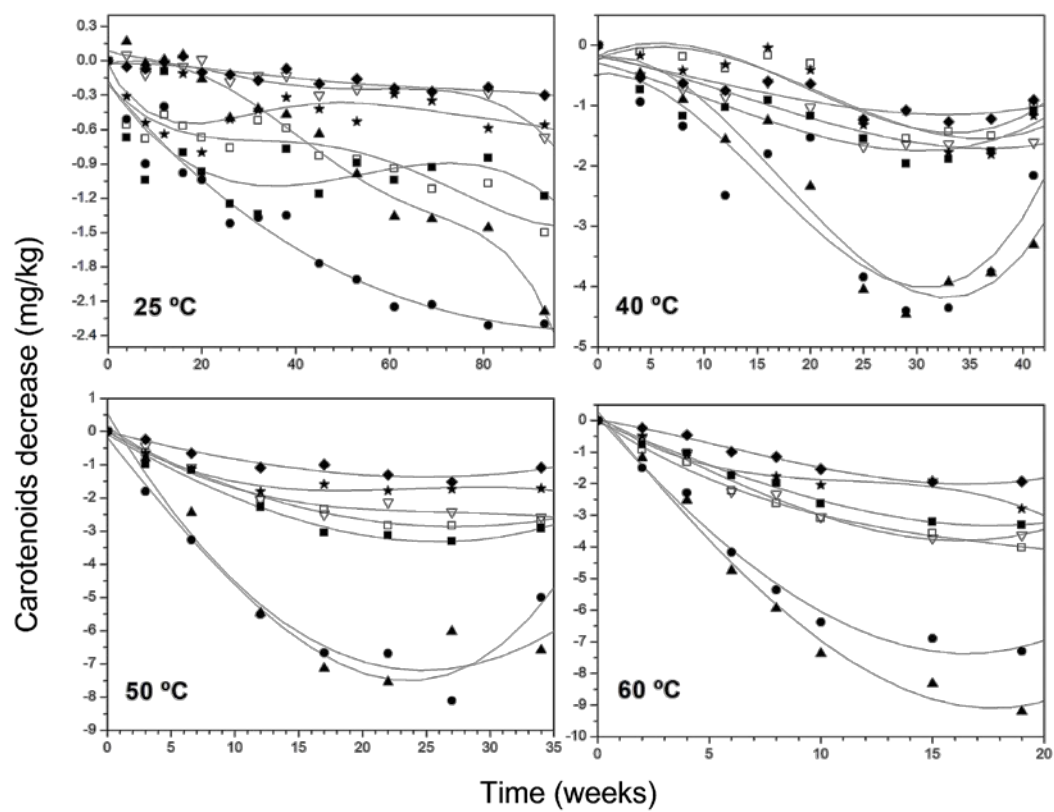

**Figure S3.** Decrease of carotenoid content in VOO samples at 25, 40, 50 and 60 °C  
 ■, I; ●, II; ▲, III; ▽, IV; ◆, V; □, VI; ○, VII

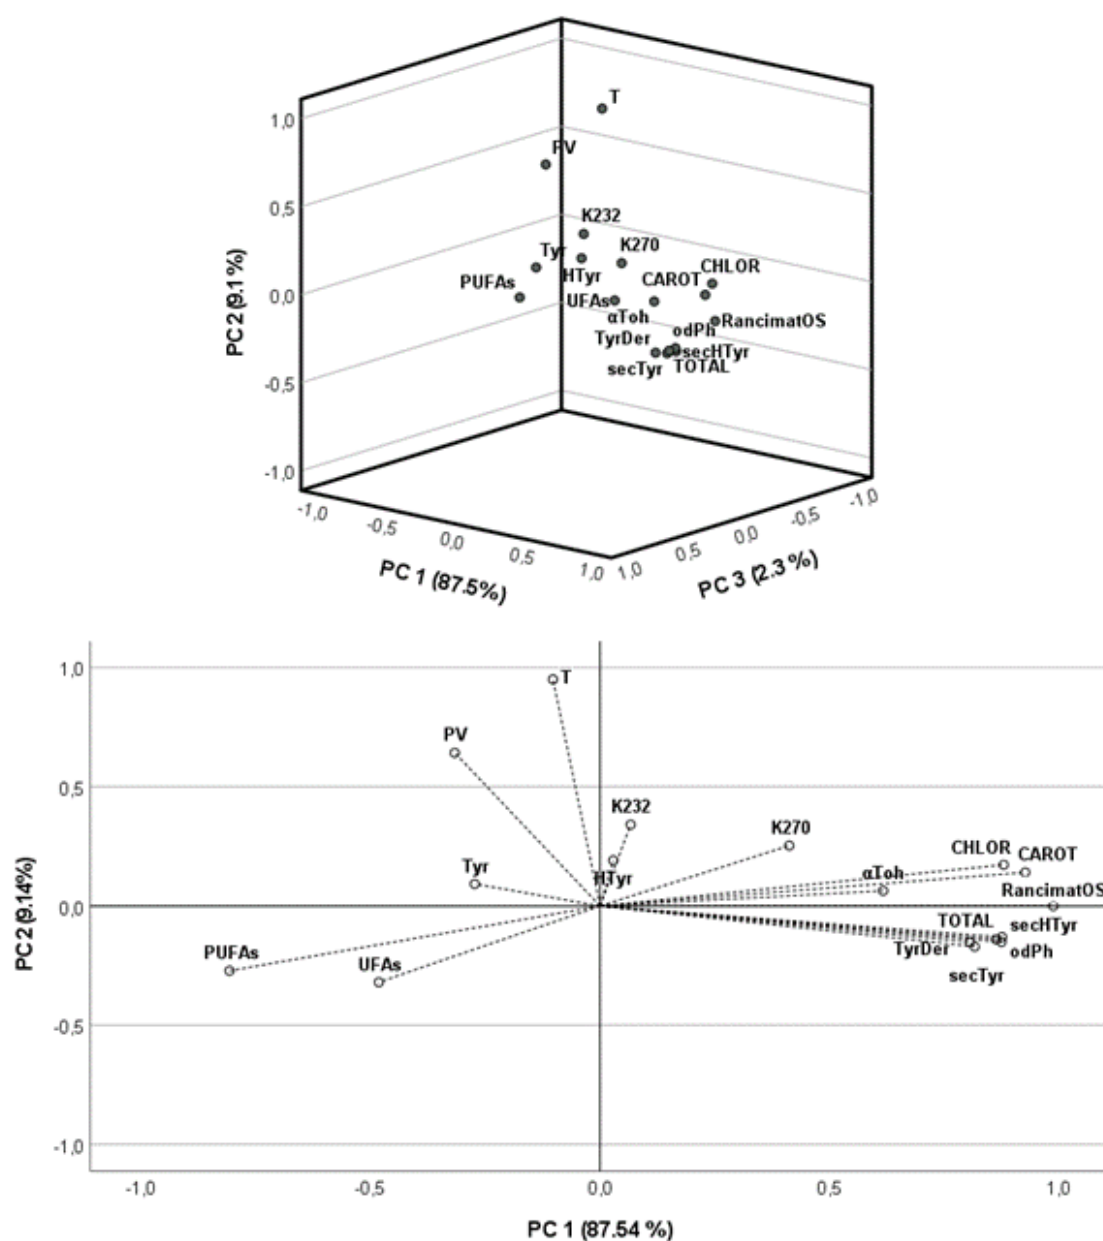

**Figure S4.** Loading plots of the principal component analysis (PCA) for variables related to the initial physical-chemical state of samples

**Table S1.** Kinetic parameters of complex phenols fitted to a pseudo first-order reaction:  $\ln(C_t/C_0) = kt$ , where  $C_0$  is the initial concentration and  $C_t$  the residual concentration at time  $t$ .

|                     |     | 25 °C        |               |                 | 40 °C        |               |                 | 50 °C         |               |                 | 60 °C         |               |                 |
|---------------------|-----|--------------|---------------|-----------------|--------------|---------------|-----------------|---------------|---------------|-----------------|---------------|---------------|-----------------|
|                     |     | $k/10^{-2}$  | $\ln C_0$     | *R <sup>2</sup> | $k/10^{-2}$  | $\ln C_0$     | *R <sup>2</sup> | $k/10^{-2}$   | $\ln C_0$     | *R <sup>2</sup> | $k/10^{-2}$   | $\ln C_0$     | *R <sup>2</sup> |
| Sec. Hydroxytyrosol | I   | -0,98 ± 0,08 | 0.666 ± 0.03  | 0.949           | -4.23 ± 0.37 | 0.335 ± 0.08  | 0.930           | -9.39 ± 0.19  | 0.273 ± 0.04  | 0.995           | -17.23 ± 0.77 | 0.176 ± 0.09  | 0.979           |
|                     | II  | -1,04 ± 0,05 | 0.699 ± 0.04  | 0.925           | -3.01 ± 0.18 | 0.289 ± 0.06  | 0.927           | -8.43 ± 0.39  | 0.411 ± 0.03  | 0.997           | -14.03 ± 0.62 | 0.225 ± 0.10  | 0.946           |
|                     | III | -1.58 ± 0.14 | 0.799 ± 0.05  | 0.956           | -8.22 ± 0.45 | 0.452 ± 0.14  | 0.932           | -14.25 ± 0.13 | 0.293 ± 0.09  | 0.987           | -23.30 ± 0.47 | 0.0005 ± 0.11 | 0.975           |
|                     | IV  | -1.47 ± 0.04 | -0.183 ± 0.05 | 0.935           | -8.69 ± 0.32 | -0.492 ± 0.13 | 0.951           | -12.35 ± 0.37 | -0.807 ± 0.18 | 0.954           | -33.10 ± 0.91 | -0.673 ± 0.08 | 0.994           |
|                     | V   | -1.67 ± 0.12 | -0.202 ± 0.05 | 0.939           | -7.11 ± 0.51 | -0.571 ± 0.15 | 0.894           | -10.52 ± 0.45 | -0.953 ± 0.15 | 0.951           | -26.45 ± 0.10 | -0.959 ± 0.06 | 0.996           |
|                     | VI  | -1.54 ± 0.05 | -1.05 ± 0.04  | 0.953           | -6.31 ± 0.17 | -1.42 ± 0.10  | 0.956           | -11.25 ± 0.24 | -1.53 ± 0.08  | 0.987           | -23.68 ± 0.49 | -1.71 ± 0.06  | 0.994           |
|                     | VII | -1.16 ± 0.07 | -0.671 ± 0.04 | 0.941           | -5.47 ± 0.20 | -1.14 ± 0.11  | 0.923           | -15.00 ± 0.62 | -1.10 ± 0.08  | 0.991           | -25.50 ± 0.35 | -1.34 ± 0.07  | 0.995           |
| Sec. Tyrosol        | I   | -0.86 ± 0.07 | 0.461 ± 0.06  | 0.739           | -1.73 ± 0.16 | 0.016 ± 0.08  | 0.763           | -2.43 ± 0.13  | -0.052 ± 0.05 | 0.918           | -10.35 ± 0.83 | -0.008 ± 0.04 | 0.977           |
|                     | II  | -1.03 ± 0.10 | 0.459 ± 0.07  | 0.786           | -1.53 ± 0.15 | 0.010 ± 0.06  | 0.821           | -3.28 ± 0.18  | 0.095 ± 0.04  | 0.968           | -5.94 ± 0.42  | -0.076 ± 0.02 | 0.980           |
|                     | III | -1.42 ± 0.04 | 0.271 ± 0.07  | 0.883           | -3.08 ± 0.14 | -0.323 ± 0.13 | 0.777           | -5.04 ± 0.09  | -0.327 ± 0.09 | 0.944           | -9.35 ± 0.58  | -0.471 ± 0.09 | 0.922           |
|                     | IV  | -0.94 ± 0.04 | -0.166 ± 0.07 | 0.753           | -2.15 ± 0.11 | -0.658 ± 0.11 | 0.738           | -3.13 ± 0.21  | -0.781 ± 0.14 | 0.719           | -13.00 ± 0.70 | -0.716 ± 0.07 | 0.964           |
|                     | V   | -1.24 ± 0.13 | -0.190 ± 0.07 | 0.818           | -2.28 ± 0.02 | -0.777 ± 0.11 | 0.749           | -2.82 ± 0.33  | -0.908 ± 0.10 | 0.794           | -9.55 ± 0.44  | -1.02 ± 0.01  | 0.999           |
|                     | VI  | -0.94 ± 0.07 | -1.36 ± 0.04  | 0.889           | -2.90 ± 0.18 | -1.68 ± 0.08  | 0.907           | -4.82 ± 0.24  | -1.59 ± 0.04  | 0.987           | -12.98 ± 0.60 | -1.84 ± 0.06  | 0.976           |
|                     | VII | -0.63 ± 0.09 | -0.541 ± 0.04 | 0.817           | -1.68 ± 0.33 | -1.06 ± 0.10  | 0.675           | -3.02 ± 0.22  | -1.07 ± 0.08  | 0.873           | -7.30 ± 0.60  | -1.21 ± 0.06  | 0.936           |
| o-diphenols         | I   | -0.87 ± 0.05 | 0.742 ± 0.03  | 0.941           | -3.62 ± 0.29 | 0.457 ± 0.07  | 0.923           | -8.20 ± 0.53  | 0.408 ± 0.07  | 0.987           | -14.88 ± 0.57 | 0.307 ± 0.07  | 0.988           |
|                     | II  | -1.00 ± 0.12 | 0.739 ± 0.04  | 0.908           | -2.51 ± 0.17 | 0.358 ± 0.06  | 0.910           | -6.77 ± 0.42  | 0.454 ± 0.06  | 0.986           | -12.28 ± 0.56 | 0.305 ± 0.08  | 0.951           |
|                     | III | -1.46 ± 0.12 | 0.841 ± 0.05  | 0.942           | -5.57 ± 0.34 | 0.427 ± 0.06  | 0.975           | -11.98 ± 0.13 | 0.388 ± 0.08  | 0.986           | -17.00 ± 1.50 | 0.062 ± 0.11  | 0.970           |
|                     | IV  | -1.29 ± 0.07 | -0.163 ± 0.05 | 0.911           | -3.89 ± 0.49 | -0.728 ± 0.14 | 0.842           | -11.48 ± 0.15 | -0.672 ± 0.13 | 0.973           | -31.98 ± 1.56 | -0.498 ± 0.13 | 0.983           |
|                     | V   | -1.24 ± 0.09 | -0.142 ± 0.05 | 0.916           | -3.71 ± 0.33 | -0.553 ± 0.07 | 0.948           | -10.67 ± 0.63 | -0.534 ± 0.10 | 0.984           | -25.90 ± 0.78 | -0.589 ± 0.07 | 0.994           |
|                     | VI  | -0.95 ± 0.04 | -0.430 ± 0.02 | 0.962           | -4.92 ± 0.18 | -0.601 ± 0.07 | 0.957           | -12.05 ± 0.58 | -0.517 ± 0.07 | 0.994           | -25.33 ± 0.25 | -0.684 ± 0.10 | 0.989           |
|                     | VII | -0.77 ± 0.05 | -0.509 ± 0.03 | 0.897           | -4.83 ± 0.18 | -0.685 ± 0.11 | 0.903           | -15.83 ± 0.57 | -0.602 ± 0.17 | 0.966           | -26.10 ± 1.15 | -0.901 ± 0.07 | 0.994           |
| Total phenols       | I   | -0.85 ± 0.01 | 1.35 ± 0.04   | 0.866           | -1.89 ± 0.28 | 0.938 ± 0.07  | 0.840           | -4.18 ± 0.11  | 0.924 ± 0.06  | 0.964           | -10.98 ± 0.64 | 0.928 ± 0.04  | 0.980           |
|                     | II  | -0.97 ± 0.01 | 1.31 ± 0.05   | 0.845           | -1.50 ± 0.25 | 0.879 ± 0.05  | 0.844           | -4.29 ± 0.23  | 1.01 ± 0.05   | 0.974           | -8.73 ± 0.44  | 0.870 ± 0.04  | 0.972           |
|                     | III | -1.39 ± 0.13 | 1.28 ± 0.05   | 0.909           | -2.81 ± 0.18 | 0.708 ± 0.13  | 0.772           | -5.35 ± 0.44  | 0.695 ± 0.12  | 0.911           | -14.75 ± 2.07 | 0.636 ± 0.11  | 0.933           |
|                     | IV  | -1.08 ± 0.10 | 0.563 ± 0.06  | 0.804           | -2.27 ± 0.23 | 0.053 ± 0.09  | 0.789           | -4.08 ± 0.09  | -0.016 ± 0.13 | 0.825           | -13.03 ± 0.74 | 0.010 ± 0.08  | 0.958           |
|                     | V   | -1.15 ± 0.12 | 0.567 ± 0.06  | 0.838           | -2.41 ± 0.15 | 0.104 ± 0.06  | 0.896           | -4.29 ± 0.14  | 0.026 ± 0.08  | 0.926           | -11.53 ± 0.45 | -0.098 ± 0.03 | 0.994           |
|                     | VI  | -0.66 ± 0.03 | 0.442 ± 0.03  | 0.852           | -2.08 ± 0.12 | 0.209 ± 0.06  | 0.893           | -4.55 ± 0.08  | 0.310 ± 0.02  | 0.995           | -10.93 ± 0.13 | 0.172 ± 0.03  | 0.990           |
|                     | VII | -0.59 ± 0.05 | 0.254 ± 0.04  | 0.738           | -2.09 ± 0.08 | -0.053 ± 0.07 | 0.849           | -4.78 ± 0.14  | -0.103 ± 0.08 | 0.940           | -10.93 ± 0.62 | -0.213 ± 0.04 | 0.985           |

$k$ , reaction rate (weeks<sup>-1</sup>)

$\ln C_0$ , obtained from the intercept for  $t=0$

\*P<0.05

(N = 4)

**Table S2.** Kinetic parameters of simple phenols and  $\alpha$ -tocopherol fitted to a pseudo zero-order reaction:  $C_t = C_0 + kt$

|             |     | 25 °C         |                |                 | 40 °C         |               |                 | 50 °C         |               |                 | 60 °C         |               |                 |
|-------------|-----|---------------|----------------|-----------------|---------------|---------------|-----------------|---------------|---------------|-----------------|---------------|---------------|-----------------|
|             |     | $k / 10^{-3}$ | $C_0$          | *R <sup>2</sup> | $k / 10^{-3}$ | $C_0$         | *R <sup>2</sup> | $k / 10^{-3}$ | $C_0$         | *R <sup>2</sup> | $k / 10^{-3}$ | $C_0$         | *R <sup>2</sup> |
| <i>HTYR</i> | I   | 0.502 ± 0.12  | 0.170 ± 0.005  | 0.608           | -1.47 ± 0.70  | 0.195 ± 0.01  | 0.425           | -8.97 ± 0.72  | 0.238 ± 0.007 | 0.981           | -12.57 ± 1.07 | 0.199 ± 0.006 | 0.972           |
|             | II  | 0.405 ± 0.09  | 0.099 ± 0.004  | 0.622           | 1.32 ± 0.27   | 0.103 ± 0.006 | 0.753           | -2.73 ± 0.22  | 0.157 ± 0.003 | 0.968           | -2.97 ± 0.44  | 0.127 ± 0.004 | 0.900           |
|             | III | 0.379 ± 0.07  | 0.118 ± 0.003  | 0.775           | -0.153 ± 0.26 | 0.140 ± 0.006 | 0.041           | -4.16 ± 0.46  | 0.153 ± 0.005 | 0.965           | -9.63 ± 0.60  | 0.171 ± 0.005 | 0.981           |
|             | IV  | 0.437 ± 0.06  | 0.035 ± 0.002  | 0.829           | -0.479 ± 0.14 | 0.058 ± 0.003 | 0.589           | -3.07 ± 0.54  | 0.069 ± 0.005 | 0.916           | -5.39 ± 0.66  | 0.058 ± 0.004 | 0.944           |
|             | V   | 0.535 ± 0.08  | 0.078 ± 0.003  | 0.781           | -1.93 ± 0.28  | 0.124 ± 0.005 | 0.887           | -6.63 ± 0.63  | 0.146 ± 0.006 | 0.974           | -10.61 ± 0.66 | 0.117 ± 0.004 | 0.985           |
|             | VI  | -1.44 ± 0.14  | 0.315 ± 0.006  | 0.903           | -6.76 ± 0.66  | 0.281 ± 0.01  | 0.946           | -16.21 ± 1.08 | 0.308 ± 0.01  | 0.987           | -28.06 ± 2.65 | 0.268 ± 0.016 | 0.966           |
|             | VII | 0.413 ± 0.12  | 0.097 ± 0.005  | 0.484           | -3.80 ± 0.81  | 0.168 ± 0.01  | 0.787           | -8.51 ± 0.33  | 0.151 ± 0.003 | 0.996           | -11.33 ± 1.15 | 0.110 ± 0.007 | 0.961           |
| <i>TYR</i>  | I   | 0.672 ± 0.06  | 0.1272 ± 0.003 | 0,907           | 2.69 ± 0.40   | 0.131 ± 0.009 | 0,849           | 1.80 ± 0.58   | 0.172 ± 0.01  | 0,621           | 5.51 ± 1.01   | 0.143 ± 0.008 | 0,857           |
|             | II  | 0.251 ± 0.07  | 0.090 ± 0.003  | 0,468           | 2.23 ± 0.31   | 0.076 ± 0.007 | 0,864           | 2.31 ± 0.48   | 0.112 ± 0.009 | 0,791           | 6.51 ± 0.71   | 0.088 ± 0.006 | 0,944           |
|             | III | 0.3724 ± 0.07 | 0.079 ± 0.003  | 0,658           | 2.51 ± 0.58   | 0.078 ± 0.01  | 0,754           | 3.06 ± 0.75   | 0.119 ± 0.01  | 0,735           | 7.02 ± 0.82   | 0.093 ± 0.007 | 0,936           |
|             | IV  | 0.588 ± 0.04  | 0.043 ± 0.002  | 0,949           | 2.78 ± 0.33   | 0.051 ± 0.007 | 0,901           | 2.62 ± 0.65   | 0.080 ± 0.01  | 0,733           | 8.16 ± 0.49   | 0.057 ± 0.004 | 0,983           |
|             | V   | 0.514 ± 0.06  | 0.066 ± 0.003  | 0,869           | 1.41 ± 0.25   | 0.080 ± 0.005 | 0,802           | 0.674 ± 0.48  | 0.116 ± 0.009 | 0,244           | 2.31 ± 0.49   | 0.093 ± 0.005 | 0,786           |
|             | VI  | -1.76 ± 0.43  | 0.646 ± 0.02   | 0,567           | -8.46 ± 3.62  | 0.603 ± 0.04  | 0,577           | -11.05 ± 1.28 | 0.634 ± 0.02  | 0,938           | -20.04 ± 1.83 | 0.564 ± 0.01  | 0,968           |
|             | VII | 0.446 ± 0.08  | 0.107 ± 0.004  | 0,704           | -0.518 ± 0.38 | 0.165 ± 0.008 | 0,189           | -2.04 ± 0.18  | 0.163 ± 0.003 | 0,965           | -3.13 ± 0.64  | 0.144 ± 0.005 | 0,829           |
| <i>TOH</i>  | I   | -1.44 ± 0.06  | 0.558 ± 0.008  | 0.936           | -7.49 ± 0.62  | 0.512 ± 0.02  | 0.974           | -25.20 ± 0.27 | 0.535 ± 0.04  | 0.973           | -54.15 ± 0.37 | 0.554 ± 0.02  | 0.986           |
|             | II  | -0.74 ± 0.04  | 0.445 ± 0.007  | 0.859           | -3.80 ± 0.30  | 0.405 ± 0.01  | 0.895           | -15.20 ± 0.22 | 0.440 ± 0.03  | 0.973           | -38.05 ± 0.39 | 0.458 ± 0.02  | 0.970           |
|             | III | -1.25 ± 0.12  | 0.546 ± 0.01   | 0.887           | -6.18 ± 0.39  | 0.493 ± 0.02  | 0.912           | -25.80 ± 0.50 | 0.559 ± 0.03  | 0.985           | -49.45 ± 0.47 | 0.566 ± 0.02  | 0.981           |
|             | IV  | -0.99 ± 0.03  | 0.400 ± 0.01   | 0.815           | -5.80 ± 0.15  | 0.362 ± 0.01  | 0.966           | -20.83 ± 0.52 | 0.378 ± 0.003 | 1.000           | -46.40 ± 0.18 | 0.410 ± 0.01  | 0.994           |
|             | V   | -0.91 ± 0.03  | 0.466 ± 0.007  | 0.886           | -5.24 ± 0.13  | 0.412 ± 0.01  | 0.949           | -19.65 ± 1.39 | 0.431 ± 0.02  | 0.994           | -46.98 ± 1.33 | 0.454 ± 0.02  | 0.982           |
|             | VI  | -1.01 ± 0.14  | 0.335 ± 0.007  | 0.905           | -3.47 ± 0.25  | 0.281 ± 0.006 | 0.97            | -16.25 ± 0.53 | 0.311 ± 0.02  | 0.992           | -34.58 ± 0.54 | 0.326 ± 0.01  | 0.984           |
|             | VII | -0.80 ± 0.04  | 0.359 ± 0.008  | 0.819           | -3.63 ± 0.14  | 0.309 ± 0.008 | 0.949           | -16.13 ± 2.11 | 0.336 ± 0.03  | 0.970           | -36.60 ± 0.53 | 0.356 ± 0.009 | 0.995           |

$k$ . reaction rate (mmol kg<sup>-1</sup> weeks<sup>-1</sup>)

$C_0$ . obtained from the intercept for  $t=0$

\*P<0.05

( $N = 4$ )

**Table S3.** Components, loadings and scores of the PCA2

| Component matrix <sup>a</sup> (loadings)         |             | Components score matrix   |
|--------------------------------------------------|-------------|---------------------------|
|                                                  | Component 1 | Component 1               |
| T                                                | -0.917      | -0.096                    |
| kPV                                              | -0.952      | -0.099                    |
| kK <sub>232</sub>                                | -0.966      | -0.101                    |
| kK <sub>270</sub>                                | -0.967      | -0.101                    |
| kTPh                                             | 0.969       | 0.101                     |
| kodPh                                            | 0.960       | 0.100                     |
| ksecHTyr                                         | 0.981       | 0.102                     |
| ksecTyr                                          | 0.944       | 0.098                     |
| k $\alpha$ Toh                                   | 0.953       | 0.099                     |
| kUFAs                                            | 0.627       | 0.065                     |
| kPUFAs                                           | 0.981       | 0.102                     |
| Extraction method: Principal Components Analysis |             | Rotation method: Varimax. |
| <sup>a</sup> . 1 extracted component             |             | Components score          |
